# Supplementary material
Source: Springer Nature journal article supplement (https://www.springermedizin.de/resource/supplementary/13075_2011_3465_MOESM2_ESM.pdf/9694208)

Treatment better than placebo

time in weeks: mean HAQ CFB (95%CrI)

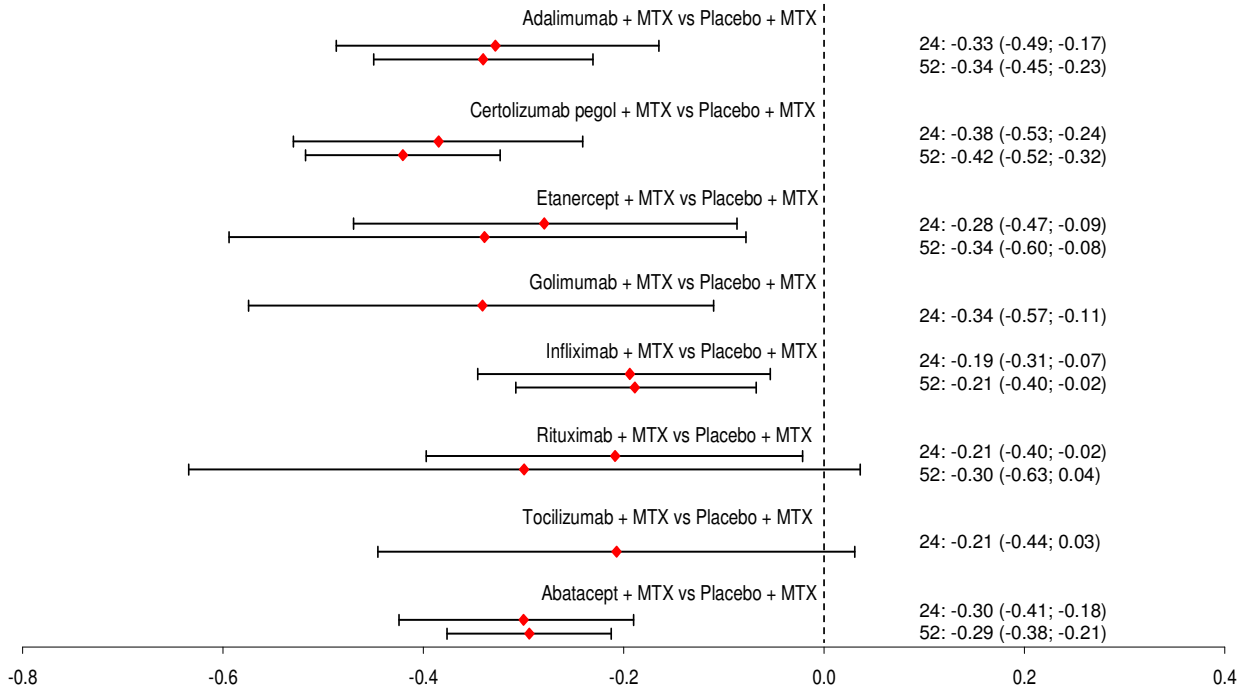

Supplement: MOESM2 [file 9694208]
